# Supplementary material for: Reversible single-crystal-to-single-crystal transformation driven by adsorption/desorption of water over organic solvents and thermal stimulation
Source: Royal Society of Chemistry journal article supplement (doi:10.1039/b817993j), 2009-01-01
Supplement: b817993j.pdf [file b817993j.pdf]

Electronic Supplementary Information

*For*

**Reversible single-crystal-to-single-crystal transformation  
driven by adsorption/desorption of water over organic solvents  
and thermal stimulation**

Man-Li Cao, Hao-Jun Mo, Jin-Juan Liang and Bao-Hui Ye\*

MOE Key Laboratory of Bioinorganic and Synthetic Chemistry, School of  
Chemistry and Chemical Engineering, Sun Yat-Sen University, Guangzhou 510275,  
China. E-mail: cesybh@mail.sysu.edu.cn

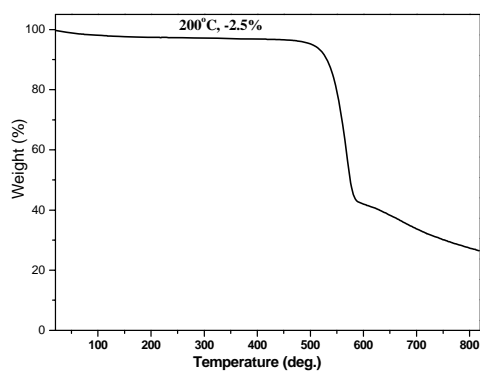

**Fig. S1** TGA for complex **1**.

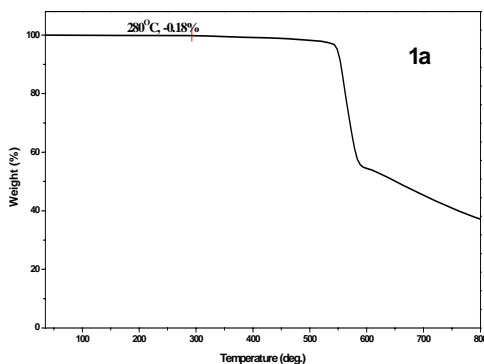

**Fig. S2** TGA for complex **1a**.

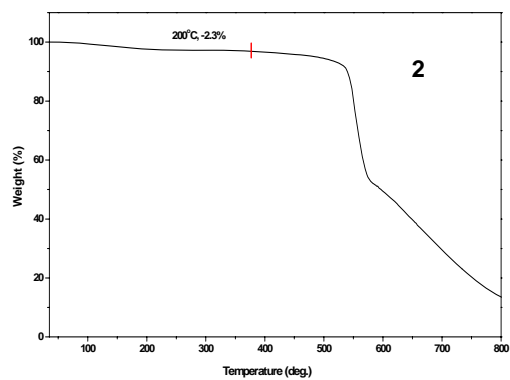

**Fig. S3** TGA for complex **2**.

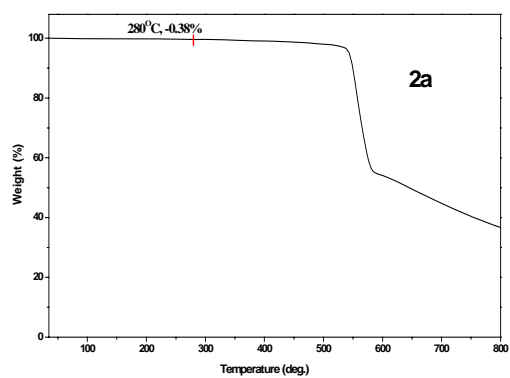

**Fig. S4.** TGA complex **2a**.

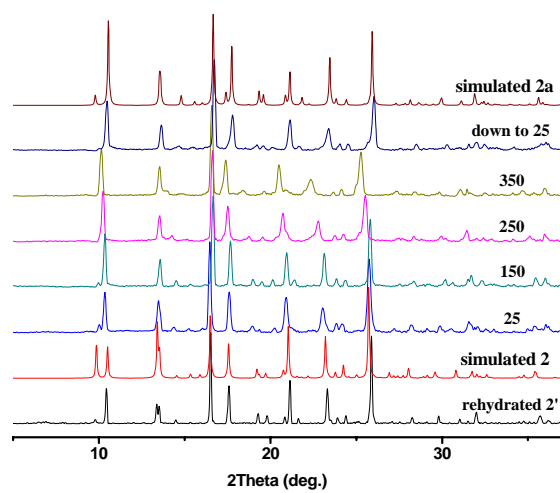

**Fig. S5.** Powder XRD patterns of the rehydrate **2'** and **2** at different temperatures, and the simulated **2** and **2a** based on the single crystal data.
